# Supplementary material for: Determinants of the Hesitancy toward COVID-19 Vaccination in Eastern European Countries and the Relationship with Health and Vaccine Literacy: A Literature Review
Source: MDPI journal article supplement (doi:10.3390/vaccines10050672), 2022-04-23
Supplement: s1 [file s1]

**Table S1.** The main characteristics of the included studies.

| No                                                  | Authors      | Period                                | Country        | Population                                                       | Sample | Data collection               | % people intend to get a vaccine                                                                               | Findings                                                                                                                                                                                                                                                                                                             |
|-----------------------------------------------------|--------------|---------------------------------------|----------------|------------------------------------------------------------------|--------|-------------------------------|----------------------------------------------------------------------------------------------------------------|----------------------------------------------------------------------------------------------------------------------------------------------------------------------------------------------------------------------------------------------------------------------------------------------------------------------|
| <b>Confidence in vaccines's safety and efficacy</b> |              |                                       |                |                                                                  |        |                               |                                                                                                                |                                                                                                                                                                                                                                                                                                                      |
| 1                                                   | Raciborski F | January and April 2021                | Poland         | General population                                               | NA     | Cross-sectional surveys       | 31.3% of individuals declared a lack of willingness to vaccinate against COVID-19 regardless of the study wave | - Statistically significant decrease in the percentage of respondents who declared concerns about the potential side effects of the COVID-19 vaccine (from 76.7% to 66.2%; $p < 0.01$ )                                                                                                                              |
| 2                                                   | Rzymiski P   | February and March 2021               | Poland         | General population                                               | 1020   | Cross-sectional online survey | NA                                                                                                             | <ul style="list-style-type: none"> <li>- The general trust in different types of vaccines</li> <li>- The level of acceptance of the COVID-19 vaccines already in use in Poland</li> <li>- Level of fear of vaccination against COVID-19</li> <li>- Main sources of information on COVID-19 vaccination</li> </ul>    |
| 3                                                   | Tran VD      | September 26th to November 9th, 2020. | Russia         | General population                                               | 876    | Cross-sectional online survey | 41.7%                                                                                                          | Predictors of the intent to COVID-19 vaccinate: <ul style="list-style-type: none"> <li>- Believing that the vaccine reduces the risk of virus infection and relieves the complications of the disease</li> <li>- Being unconcerned about side effects and the effectiveness and safety of the vaccination</li> </ul> |
| 4                                                   | Štěpánek L   | 30 April - 30 June 2021               | Czech Republic | Individuals (n = 7480) who had received at least one dose of the | 3224   | Cross-sectional surveys       | 95%                                                                                                            | <ul style="list-style-type: none"> <li>- To protect family members (76.2%),</li> <li>- To prevent the spread of COVID-19 (72.3%)</li> </ul>                                                                                                                                                                          |

[illegible]

|                                                   |              |                     |                |                    |         |                       |                                                                                         |                                                                                                                                                                                                                                                                |
|---------------------------------------------------|--------------|---------------------|----------------|--------------------|---------|-----------------------|-----------------------------------------------------------------------------------------|----------------------------------------------------------------------------------------------------------------------------------------------------------------------------------------------------------------------------------------------------------------|
| 9                                                 | Wawrzuta D   | NA                  | Poland         | General population | 1000    | Facebook comments     | Pro-vaccine comments increased from 7% to 22% during the event of the first vaccination | Determinants of negative comments on COVID19 vaccination:<br>- Lack of trust in the government<br>- COVID-19 vaccines are dangerous to health<br>- Restriction of free choice<br>- Developed too quickly and without a proper test<br>- Vaccines' side effects |
| <b>Association with spirituality and religion</b> |              |                     |                |                    |         |                       |                                                                                         |                                                                                                                                                                                                                                                                |
| 10                                                | Kosarkova A  | April 2021          | Czech Republic | General population | 459     | Cross sectional       | 10%                                                                                     | - Associations of spirituality and religious fundamentalism with religious conspiracy theories about COVID-19 vaccination                                                                                                                                      |
| 11                                                | Raciborski F | 8 and 18 April 2021 | Poland         | General population | 1131    | Cross-sectional study | □ 70%;                                                                                  | The factors associated with a lack of willingness to vaccinate against COVID:<br>- People who declared support for one of the right-wing political parties<br>- Rural areas<br>- Lack of higher education                                                      |
| 12                                                | Sowa P       | 12 and 23 of March  | Poland         | General population | 1000    | Cross sectional       | vaccine hesitancy - 49.2%                                                               | Determinants of vaccine hesitancy:<br>- Fear of vaccines' side effects<br>- Beliefs in conspiracy theories<br>- Physical fitness                                                                                                                               |
| <b>Conspiracy beliefs</b>                         |              |                     |                |                    |         |                       |                                                                                         |                                                                                                                                                                                                                                                                |
| 13.                                               | Teovanovic P | 10-22 April 2020    | Serbia         | General            | N = 407 | Direct questionnaire  | 49.1% (n = 200)                                                                         | Predictors of vaccine hesitancy:<br>- Stronger beliefs in COVID-19<br>- Conspiracy theories<br>- Higher levels of COVID-19 related knowledge overestimation<br>- Higher susceptibility to cognitive biases                                                     |
| 14                                                | Petravić L   | December 2020 to    | Slovenia       | General population | 12,042  | Online survey         | 59%                                                                                     | Estimate the factors that impact the decision of vaccination:<br>- Relatives hospitalized or died due to the virus                                                                                                                                             |

|                                                                    |                    |                             |                              |                                |      |                                      |                                                             |                                                                                                                                                                                                                                                                                                             |
|--------------------------------------------------------------------|--------------------|-----------------------------|------------------------------|--------------------------------|------|--------------------------------------|-------------------------------------------------------------|-------------------------------------------------------------------------------------------------------------------------------------------------------------------------------------------------------------------------------------------------------------------------------------------------------------|
|                                                                    |                    |                             |                              |                                |      |                                      |                                                             | - Healthcare workers                                                                                                                                                                                                                                                                                        |
| 15                                                                 | Maftai A           | January 2021                | Romania                      | General population             | 247  | Cross sectional                      | 40% expressed total rejection of vaccine                    | - Conspiracy beliefs mediated the relationship between threat perception and willingness of participants to vaccinate                                                                                                                                                                                       |
| 16                                                                 | Walkowiak MP       | 30 June and 31 August 2021. | Poland                       | General population             | NA   | Longitudinal                         | increased vaccination rate from 44.2% by an additional 6.6% | - Negative relationship between vaccination rate and conspiratorial views, religiosity, social deprivation and education                                                                                                                                                                                    |
| 17                                                                 | Riad A             | NA                          | Czech Republic               | Nonmedical university students | 1351 | Cross-Sectional                      | 73.3%                                                       | Predictors of vaccine acceptance:<br>- Trust in the pharmaceutical industry<br>- Trust in healthcare providers,<br>- Perceived knowledge sufficiency<br>Predictors of vaccine hesitancy:<br>- Media and social media,<br>- Personal beliefs,<br>- Immunity misconception,<br>- Previous COVID-19 infection, |
| <b>The influence of the community in shaping personal opinions</b> |                    |                             |                              |                                |      |                                      |                                                             |                                                                                                                                                                                                                                                                                                             |
| 18                                                                 | Cristea D          | April 2021                  | Romania                      | General population             | 1001 | Cross sectional telephonic interview | 40.1% pro vaccination                                       | - Social dimension influenced the willingness to vaccinate                                                                                                                                                                                                                                                  |
| 19                                                                 | Kregar Velikonja N | 12 February - 5 March 2021  | Slovenia, Poland, and Serbia | Nursing students               | 872  | Cross-sectional study                | 35%                                                         | Vaccination predictors:<br>- Benefits of the vaccine<br>- Trust in institutions<br>- Perceived effectiveness of the vaccine influence of the social environment                                                                                                                                             |
| <b>Health and vaccine literacy</b>                                 |                    |                             |                              |                                |      |                                      |                                                             |                                                                                                                                                                                                                                                                                                             |
| <b>Vaccine literacy in general population</b>                      |                    |                             |                              |                                |      |                                      |                                                             |                                                                                                                                                                                                                                                                                                             |
| 20                                                                 | Gusar I            | 15 to 31 January 2021       | Croatia                      | General population             | 1227 | Cross-sectional study                |                                                             | Higher levels of vaccine literacy provided:<br>- Affirmative answers to questions about the production of safe and efficient vaccines                                                                                                                                                                       |

|                                                                    |               |                                    |                     |                         |      |                         |                                |                                                                                                                                                                                                                                                                                                                                                    |
|--------------------------------------------------------------------|---------------|------------------------------------|---------------------|-------------------------|------|-------------------------|--------------------------------|----------------------------------------------------------------------------------------------------------------------------------------------------------------------------------------------------------------------------------------------------------------------------------------------------------------------------------------------------|
|                                                                    |               |                                    |                     |                         |      |                         |                                | - The possibility of vaccinating the entire population, and the need to vaccinate children                                                                                                                                                                                                                                                         |
| <b>Attitudes towards vaccination in health workers or students</b> |               |                                    |                     |                         |      |                         |                                |                                                                                                                                                                                                                                                                                                                                                    |
| 21                                                                 | Herdea V      | 13 -27 of March 2020               | Romanian physicians | Romania                 | 319  | Cross-sectional study   | 61% would agree to vaccination | Predictor of vaccine acceptance:<br>- High level of fear related to COVID-19 pandemic                                                                                                                                                                                                                                                              |
| 22                                                                 | Zdziarski K   | February 2021                      | Poland              | Medical doctors         | 149  | Online survey           |                                | - Responsibility for their own health, care for their relatives and patients<br>- Vaccine will contribute to stopping the pandemic                                                                                                                                                                                                                 |
| 23                                                                 | Konopińska J  | January 2021                       | Poland              | Ophthalmology residents | 126  | Online survey           | 71.4%                          | - Willingness to wait for the effectiveness<br>- Long-term adverse effects of the vaccine to be assessed (72.2%)<br>- Feeling that the vaccine was not sufficiently tested (58.3%),<br>- Fear of complications (41.7%)<br>- The belief that having already contracted COVID-19 protects them from further infections                               |
| 24                                                                 | Ulbrichtova R | 30 August 2021 - 30 September 2021 | Slovakia            | Healthcare workers      | 1277 | Cross-sectional         | 84.3%) were vaccinated         | Predictors significantly associated with COVID-19 vaccination acceptance:<br>- History of COVID-19 (OR = 0.37; CI95 0.26-0.37),<br>- Influenza vaccination (OR = 1.97; CI95 1.12-3.46),<br>- Compulsory vaccination for HCWs (OR = 9.15; CI95 2.92-28.62),<br>- Compulsory vaccination for selected groups (OR = 9.71; CI95 2.75-34.31) were the e |
| 25                                                                 | Balan A       | 12 January until 3 March 2021      | Romania             | Medical Students        | 1581 | Cross-sectional surveys | 88.5%                          | - Perceived knowledge on the vaccines' safety, efficacy, and technology correlated with a pro-vaccine attitude                                                                                                                                                                                                                                     |

|                                                                                    |             |                               |                                                                   |                                       |                                |                         |                                        |                                                                                                                                                                                                                                                                                                                                                       |
|------------------------------------------------------------------------------------|-------------|-------------------------------|-------------------------------------------------------------------|---------------------------------------|--------------------------------|-------------------------|----------------------------------------|-------------------------------------------------------------------------------------------------------------------------------------------------------------------------------------------------------------------------------------------------------------------------------------------------------------------------------------------------------|
| 26                                                                                 | Sovicova M  | 10 March 2021 - 24 March 2021 | Slovakia                                                          | Medical students                      | 1228                           | Online questionnaire    | 71.7%)                                 | Barriers towards vaccination:<br>- Side effects from the COVID-19 vaccine<br>- Belief that COVID-19 vaccine may not be effective<br>- Needing more information about the COVID-19 vaccine                                                                                                                                                             |
| 27                                                                                 | Patelarou E | December 2020- January 2021   | Greece, Albania, Cyprus, Spain, Italy, Czech Republic, and Kosovo | Nursing students                      | 2249                           | Web survey              | 53.8%                                  | Barriers<br>- no working experience in healthcare facilities during the pandemic ( $p = 0.001$ ),<br>Facilitators<br>- Vaccination for influenza in 2019 and 2020 ( $p < 0.001$ ),<br>- Trust in doctors ( $p < 0.001$ ), governments and experts ( $p = 0.012$ )<br>- High level of knowledge ( $p < 0.001$ )<br>- Fear of COVID-19 ( $p < 0.001$ ). |
| 28                                                                                 | Gotlib J    | March and April 2021          | Poland                                                            | Poland Nursing undergraduate students | 793                            | Cross sectional         | 77.2% were vaccinated against COVID-19 | - Universities' role in education about vaccinations and in shaping pro-vaccine attitudes among students                                                                                                                                                                                                                                              |
| 29                                                                                 | Szmyd B     | 22 and 25 December 2020       | Poland                                                            | Medical (MS) and nonmedical (NMS)     | 1971 - 687 (MS) and 1284 (NMS) | Online questionnaire    | 91.99% MS<br>59.42% NMS                | - Medical studies form pro-vaccination behaviors                                                                                                                                                                                                                                                                                                      |
| <b>Confidence in the healthcare system, government, and public health measures</b> |             |                               |                                                                   |                                       |                                |                         |                                        |                                                                                                                                                                                                                                                                                                                                                       |
| 30                                                                                 | Štěpánek L  | February-May 2021             | employees of a tertiary care hospital                             | Czech Republic                        | 4553                           | Cross-sectional surveys | 69.8%                                  | The motive for acceptance<br>- The effort to protect family members (84%)<br>Reasons for hesitancy<br>- Concerns about vaccine safety and side effects (49.4%)<br>- Distrust in the vaccine's efficacy (41.1%)                                                                                                                                        |
| 31                                                                                 | Stasiuk K   | December 2020                 | Poland                                                            | General population                    | 400                            | Longitudinal            |                                        | - A positive belief in the data published on the Internet by unprofessional sources predicted                                                                                                                                                                                                                                                         |

|                                                             |            |                                    |                                                           |                          |      |                                 |                                |                                                                                                                                                                                                                                                                                                                                                                                                           |
|-------------------------------------------------------------|------------|------------------------------------|-----------------------------------------------------------|--------------------------|------|---------------------------------|--------------------------------|-----------------------------------------------------------------------------------------------------------------------------------------------------------------------------------------------------------------------------------------------------------------------------------------------------------------------------------------------------------------------------------------------------------|
|                                                             |            |                                    |                                                           |                          |      |                                 |                                | a negative attitude towards vaccination                                                                                                                                                                                                                                                                                                                                                                   |
| 32                                                          | Rozek LS   | NA                                 | seventeen countries/territories across five world regions | General population       | NA   | Cross-sectional                 | Ukraine, 64% vaccine hesitancy | <ul style="list-style-type: none"> <li>- Confidence in the national health ministry and the local health department is lower than it is in the WHO in Poland (68% vs. 56% and 51%); Russia (63% vs. 40% and 29%); and Ukraine (59% vs. 50% and 35%)</li> <li>- Ukraine is the only country in which the proportion of respondents that expressed trust in medical professionals fell below 80%</li> </ul> |
| 33                                                          | Goodwin R  | January 2021 to April 2021         | Hungary, Israel, Japan                                    | General population       | 3138 | Ecological-systems approach     | Hungary, 31%                   | <ul style="list-style-type: none"> <li>- In Hungary, vaccine willingness was greatest amongst respondents who trusted their government (<math>\beta = 0.37</math>, <math>p &lt; 0.001</math>)</li> <li>- Multi-group latent class analysis identified allergies in Hungary as a COVID vaccination myth</li> </ul>                                                                                         |
| <b>Predictors of willingness/unwillingness to vaccinate</b> |            |                                    |                                                           |                          |      |                                 |                                |                                                                                                                                                                                                                                                                                                                                                                                                           |
| 34                                                          | Lazarus JV | June 2020                          | 13,426 people in 19 countries                             | Poland                   | 666  | Online questionnaire            | 56.3%                          | - Identification of potential pockets of heightened distrust                                                                                                                                                                                                                                                                                                                                              |
|                                                             |            |                                    |                                                           | Russia                   | 680  |                                 | 54.9%                          |                                                                                                                                                                                                                                                                                                                                                                                                           |
| 35                                                          | Szmyd B    | 22 December 2020 to 8 January 2021 | Poland                                                    | Healthcare workers (HCW) | 2300 | Google Forms survey             | NA                             | - Willingness to get vaccinated related to Depression, Anxiety and Stress Scale-21 (OR = 1.050, 95% CI: 1.011–1.089, $p = 0.011$ ).                                                                                                                                                                                                                                                                       |
| 36                                                          | Riad A     | 21 April 2021 to 15 June 2021      | Czech Republic                                            | University students      | 1351 | Self-administered questionnaire | 73.3%                          | - Higher probabilities of vaccine uptake were predicted by the trust in the pharmaceutical sector and healthcare providers, and by the perceived knowledge sufficiency.                                                                                                                                                                                                                                   |

|                                       |                   |                                       |                             |                                                                        |      |                                 |                                                                                          |                                                                                                                                                                                                                                                                                                                                                                                                                                                                   |
|---------------------------------------|-------------------|---------------------------------------|-----------------------------|------------------------------------------------------------------------|------|---------------------------------|------------------------------------------------------------------------------------------|-------------------------------------------------------------------------------------------------------------------------------------------------------------------------------------------------------------------------------------------------------------------------------------------------------------------------------------------------------------------------------------------------------------------------------------------------------------------|
| 37                                    | Lindholt MF       | 13 September 2020 to 16 February 2021 | Hungary, Denmark and France | General population                                                     | 7500 | Self-administered questionnaire | Hungary, 47%                                                                             | - Lack of vaccine acceptability is linked to mistrust in authorities and scientists, to conspiracy theories, and to a lack of concern about COVID-19.                                                                                                                                                                                                                                                                                                             |
| <b>Studies on distinct population</b> |                   |                                       |                             |                                                                        |      |                                 |                                                                                          |                                                                                                                                                                                                                                                                                                                                                                                                                                                                   |
| 38                                    | Gheorghe AS       | April-May 2020                        | Romania                     | Oncologic patients                                                     | 1585 | Direct questionnaire            | 72.18%                                                                                   | - Describe the knowledge, attitude and practices (KAP) related to COVID-19 among Romanian oncological patients                                                                                                                                                                                                                                                                                                                                                    |
| 39                                    | Matovina Brko G   | July and August 2021                  | Serbia                      | Oncologic patients                                                     | 767  | Cross sectional                 | 41%                                                                                      | - Reluctant of receiving vaccine due to fear of side due to side effects                                                                                                                                                                                                                                                                                                                                                                                          |
| 40                                    | Marijanović I     | February 2021                         | Bosnia and Herzegovina      | Oncologic patients                                                     | 364  | Cross sectional                 | 41.8% answered "Yes" when asked if they would take the vaccine once it becomes available | - In favor of vaccination, the main reasons reported were fear of getting sick (77.6%), the desire to contribute to herd immunity (57.8%), and trusting the recommendations of health professionals (57.2%).<br>- Main reasons for the patients' vaccination -refusal/indecision were doubts about the results from clinical trials of COVID-19 vaccines (49.1%), concerns about adverse effects (24.5%), and confusion about the various vaccine options (19.8%) |
| 41                                    | Kufel-Grabowska J | November 2020 to February 2021        | Poland                      | Polish patients suffering from various chronic diseases, mainly cancer | 836  | Cross-sectional study           | 60.5% intended to vaccinate                                                              | - Fear of vaccine complications and lack of belief in vaccine effectiveness                                                                                                                                                                                                                                                                                                                                                                                       |
| 42                                    | Puteikis K        | December 2020                         | Lithuania                   | Pateints with epilepsy and their caregivers                            | 111  | Online cross-sectional survey   | 46.6% PWE<br>34.0% caregivers                                                            | - Thought it could cause the infection (OR = 0.14, 95% CI = 0.04-0.49)                                                                                                                                                                                                                                                                                                                                                                                            |



|    |           |                                   |                        |                                 |        |     |                                                                                      |                                    |                                                                                                                                                                                                      |
|----|-----------|-----------------------------------|------------------------|---------------------------------|--------|-----|--------------------------------------------------------------------------------------|------------------------------------|------------------------------------------------------------------------------------------------------------------------------------------------------------------------------------------------------|
| 43 | Skjefte M | October 28 and November 18, 2020. | 16 countries<br>Russia | Non-pregnant mothers            | 537    | 383 | Online questionnaire                                                                 | 48% likely to accept COVID vaccine | - Confident in the safety of COVID-19 vaccine post-approval by country's health agencies (OR=15.3, 95%CI 5.96-39.3)                                                                                  |
|    |           |                                   |                        | Pregnant women                  |        | 154 |                                                                                      |                                    | - Confident in COVID-19 vaccine efficacy post-approval by country's health Agencies (OR=15.2, 95% CI 34- 31.6)                                                                                       |
| 44 | Oroszi B  | 25 January 2021 to 4 July 2021    | Hungary                | Cases with confirmed SARS-CoV-2 | 447966 |     | Calculation of indirectly standardized ratios, classified into deprivation quintiles | NA                                 | - Compared to the national average, people living in the most deprived municipalities had a 38% lower vaccination coverage.                                                                          |
| 45 | Sándor J  | Vaccinations until 30 June 2021   | Hungary                | General population              | NA     |     | National Health Insurance Fund database of vaccinations.                             | NA                                 | - Crude vaccination coverage was significantly lower in deprived populations living in segregated colonies (40.05%, 95% CI 39.87%-40.23%) than in complementary areas (65.42%, 95% CI 65.37%-65.46%) |
